# Supplementary material for: Monitoring Electrical Biasing of Pb(Zr0.2Ti0.8)O3 Ferroelectric Thin Films In Situ by DPC-STEM Imaging
Source: MDPI journal article supplement (doi:10.3390/ma14164749), 2021-08-23
Supplement: s1 [file s1]

# Supplementary Materials: Monitoring electrical biasing of ferroelectric Pb(Zr<sub>0.2</sub>Ti<sub>0.8</sub>)O<sub>3</sub> thin-film in-situ by DPC-STEM imaging

Alexander Vogel <sup>1,\*</sup>, Martin F. Sarott <sup>2</sup>, Marco Campanini <sup>1</sup>, Morgan Trassin <sup>2</sup> and Marta D. Rossell <sup>1,\*</sup>

<sup>1</sup> Electron Microscopy Center, Empa, Swiss Federal Laboratories for Material Science and Technology, 8600 Dübendorf, Switzerland; marco.campanini1@gmail.com

<sup>2</sup> Department of Materials, Eidgenössische Technische Hochschule Zürich, 8093 Zürich, Switzerland; martin.sarott@mat.ethz.ch (M.F.S.); morgan.trassin@mat.ethz.ch (M.T.)

\* Correspondence: alexander.vogel@empa.ch (A.V.); marta.rossell@empa.ch (M.D.R.)

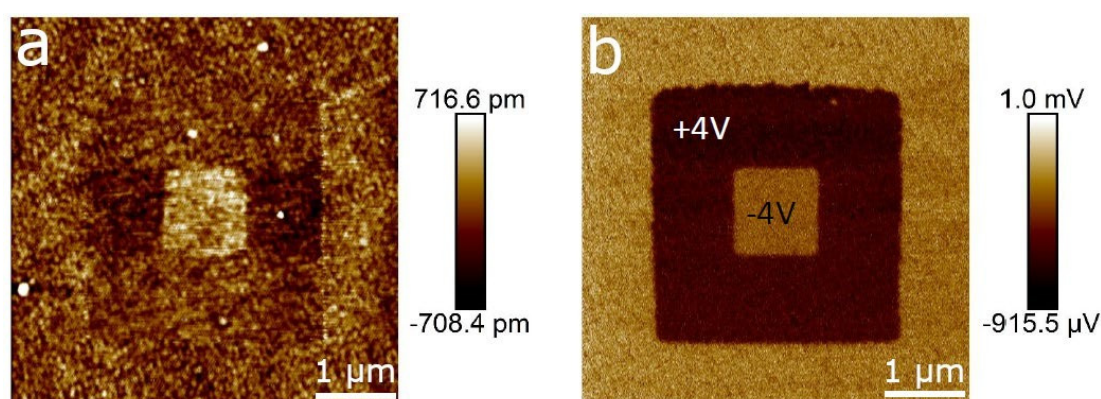

**Figure S1.** (a) Topography measurement performed simultaneously with the Piezoresponse force microscopy (PFM) measurement, showing a root-mean-square roughness of 0.26 nm. (b) Out-of-plane PFM measurement of the thin film.  $\pm 4$  V was reversibly applied to the scanning tip to locally switch the out-of-plane oriented polarization of the film.

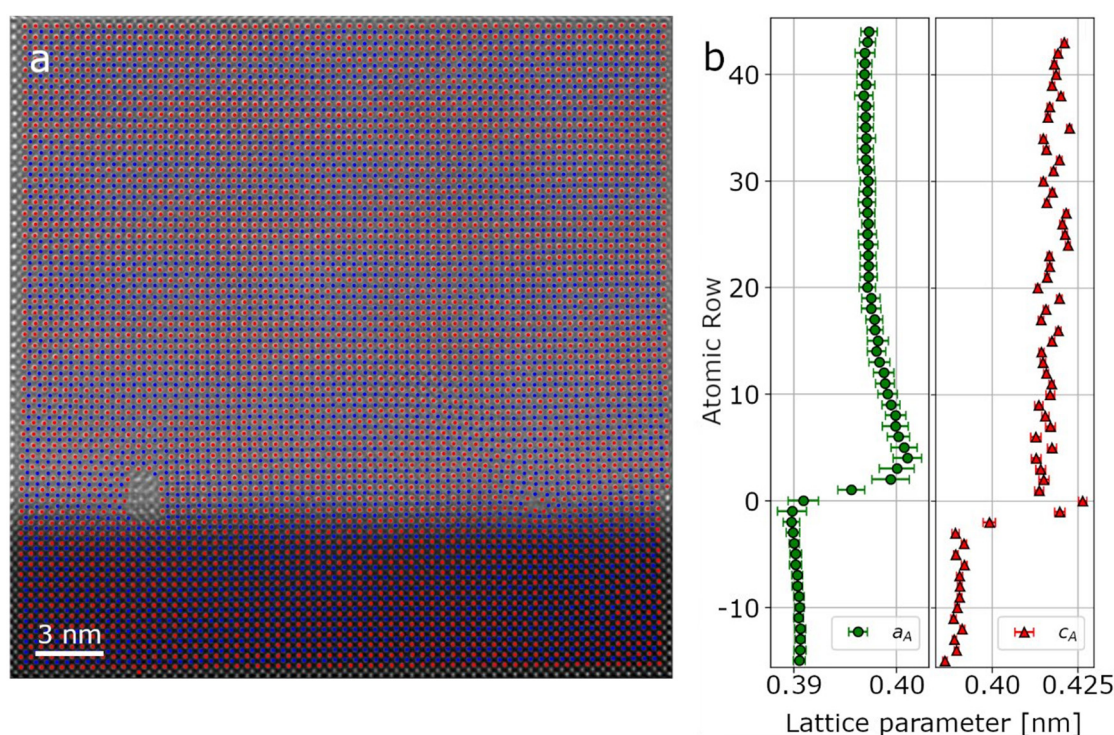

**Figure S2.** (a) Result of atom column fitting using atomap. (b) In-plane ( $a_A$ ) and out-of-plane ( $c_A$ ) lattice parameters extracted from the A-cation positions. The 0<sup>th</sup> row is chosen at the PZT/STO interface.
